# Supplementary material for: Contribution of Capillary Zone Electrophoresis Hyphenated with Drift Tube Ion Mobility Mass Spectrometry as a Complementary Tool to Microfluidic Reversed Phase Liquid Chromatography for Antigen Discovery
Source: MDPI journal article supplement (doi:10.3390/ijms232113350), 2022-11-01

# Contribution of Capillary Zone Electrophoresis Hyphenated with Drift Tube Ion-mobility Mass Spectrometry as a Complementary Tool to Microfluidic Reversed Phase liquid Chromatography for Antigen Discovery

Marie-Jia Gou<sup>1</sup>, Murat Cem Kose<sup>2</sup>, Jacques Crommen<sup>1</sup>, Cindy Nix<sup>1</sup>, Gaël Cobraiville<sup>1</sup>, Jo Caers<sup>2,3</sup> and Marianne Fillet<sup>1\*</sup>

**Table S1.** Sequence, m/z ratio and pI of 25 peptides identified using both BFS and PVA capillaries. Peptides are sorted by increasing migration time in BFS capillary.

| Sequence                          | m/z       | Charge | Mass (Da) | pI   | MT-BFS (min) | MT-PVA (min) |
|-----------------------------------|-----------|--------|-----------|------|--------------|--------------|
| VIEPVKR                           | 280.8469  | 3      | 840.53    | 8.72 | 25.27        | 30.8310      |
| NVYIK                             | 318.686   | 2      | 636.37    | 8.59 | 27.47        | 32.2300      |
| VEDALHATR                         | 337.8473  | 3      | 1011.52   | 5.32 | 28.25        | 32.6420      |
| GYRPQFYFR                         | 411.8769  | 3      | 1233.62   | 9.99 | 28.63        | 32.7170      |
| SYPLDIHNVQDHLK                    | 420.4705  | 4      | 1678.85   | 5.93 | 28.72        | 33.2677      |
| IGIQPGHIHKPGK                     | 461.2727  | 3      | 1381.81   | 10   | 29.55        | 33.4260      |
| FAENAYFIK                         | 551.781   | 2      | 1102.56   | 6    | 30.54        | 34.3123      |
| GNFDLEGLER                        | 575.2809  | 2      | 1149.55   | 4.14 | 31.89        | 35.0297      |
| AVEIGSFLLGR                       | 581.3341  | 2      | 1161.66   | 6.05 | 33.16        | 36.0417      |
| NIFGYQYTIPTHQGR                   | 598.9755  | 3      | 1794.89   | 8.6  | 33.74        | 36.4447      |
| DTTIIIDGVGEEAAIQGR                | 615.9756  | 3      | 1845.92   | 3.91 | 34.02        | 37.1473      |
| ELANVQDLTVR                       | 629.3494  | 2      | 1257.68   | 4.37 | 34.06        | 37.2237      |
| TTDVTGTIELPEGVEMVMPGDNIK          | 652.3935  | 2      | 1303.78   | 8.41 | 34.95        | 38.0027      |
| AFDQIDNAPEEK                      | 688.8246  | 2      | 1376.63   | 3.91 | 35.55        | 38.1320      |
| KYDIPVVMDSAR                      | 697.361   | 2      | 1393.71   | 5.96 | 35.72        | 38.8093      |
| LAATIAQLPDQIGAK                   | 755.4356  | 2      | 1509.86   | 5.84 | 36.65        | 39.0623      |
| DDSFVDVYTECR                      | 777.317   | 2      | 1553.62   | 3.84 | 37.07        | 39.2707      |
| TLCVVQEGFPTYGGLEGGAMER            | 791.0434  | 3      | 2371.11   | 4.25 | 37.33        | 39.6523      |
| LLPHIPADQFPAQALACELYK             | 799.0847  | 3      | 2395.25   | 5.32 | 37.76        | 39.9040      |
| IELSSAQQTVDNLPYITADATGPK          | 844.7641  | 3      | 2535.28   | 4.03 | 38.09        | 41.5890      |
| TTDVTGTIELPEGVEMVMPGDNIK          | 849.4201  | 3      | 2546.23   | 3.83 | 39.68        | 42.2980      |
| LGYNLVVLDLSDQNNPAK                | 872.9659  | 2      | 1744.92   | 5.83 | 39.77        | 43.0197      |
| FCGAELNNVITLSTFR                  | 949.9789  | 2      | 1898.94   | 6    | 41.11        | 43.1617      |
| GIEEVGPNNVPYIVATITSNSAGGQPVSLANLK | 1103.9138 | 3      | 3309.73   | 4.53 | 41.16        | 43.2217      |
| IAQVQYLVDGLEEIGVVCQQAGGHAAAFVDAGK | 1114.8996 | 3      | 3342.68   | 4.31 | 43.28        | 44.2377      |

**Figure S1.** Diagram of the CZE-DTIMS-QTOF (a) and RPLC-Chip-DTIMS-QTOF (b) setups used in this study.

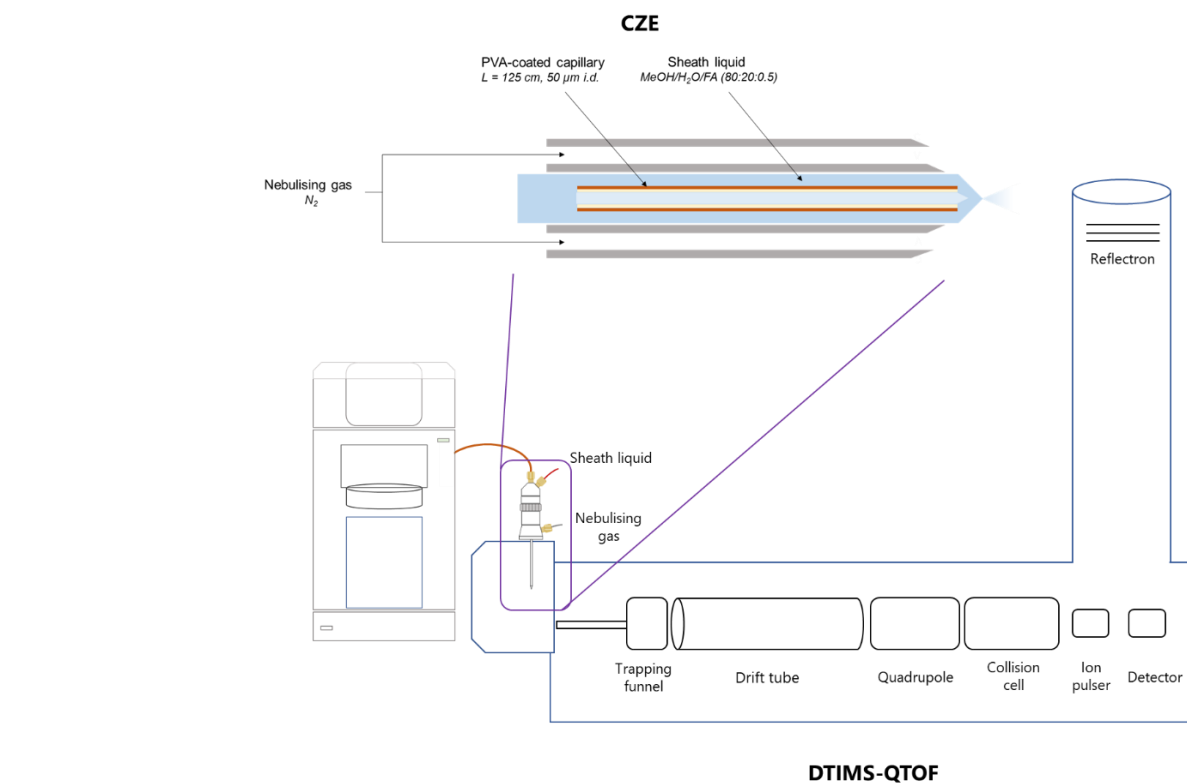

(a)

(b)

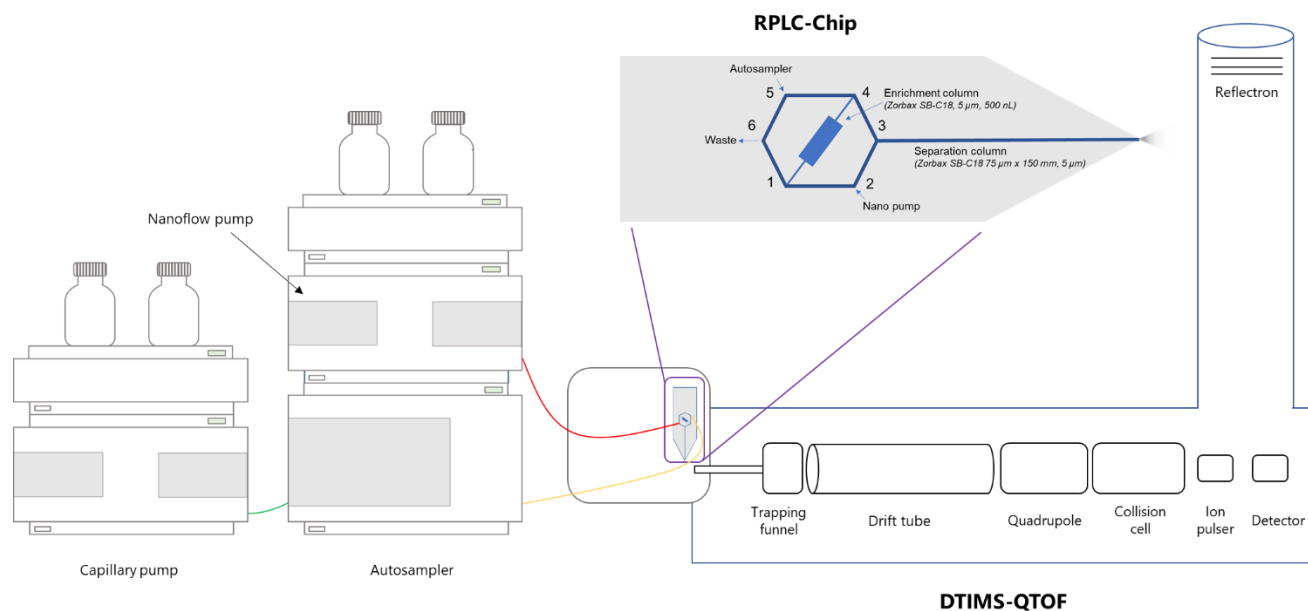

**Figure S2.** Number of (a) peptides and (b) proteins obtained by analyzing four concentrations of *E. coli* digest using BFS and PVA-coated capillaries. Statistic comparisons were performed using GraphPad Prism (La Jolla, CA, USA). (Mann-Whitney test; \*\*\*,  $P \leq 0.001$  and \*\*\*\*,  $P \leq 0.0001$ )

(a)

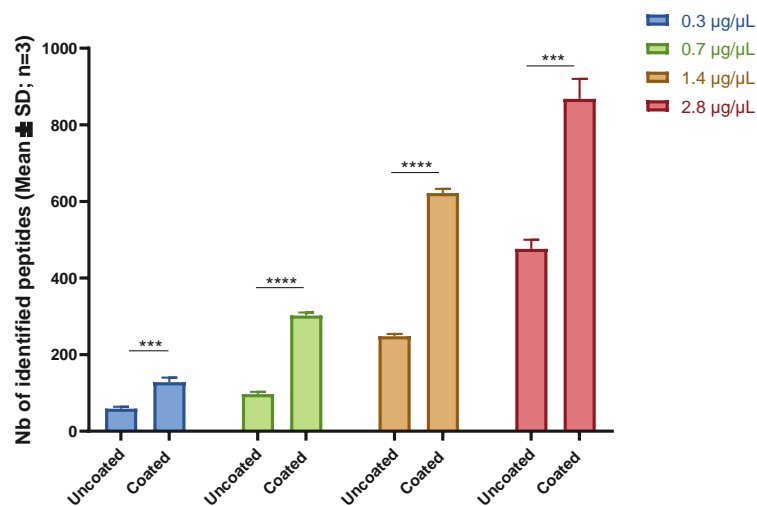

(b)

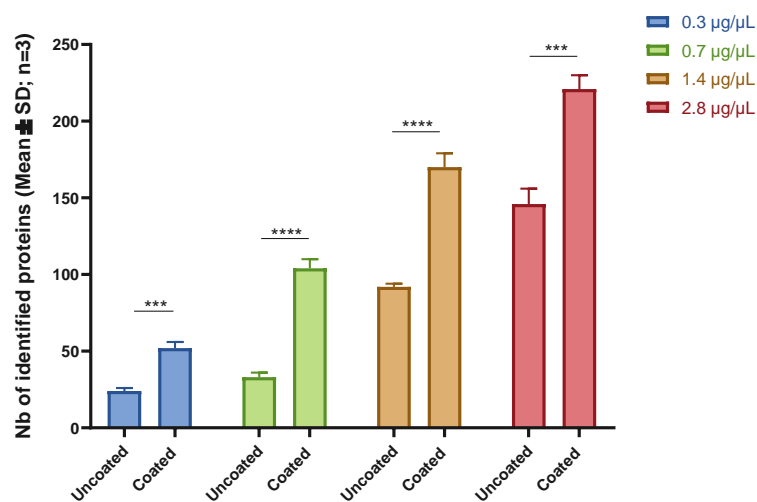

**Figure S3.** Total ion count (TIC) of 0.25  $\mu\text{g}$  of *E. coli* digest injected in as BFS capillary (top) and a PVA-coated capillary (down).

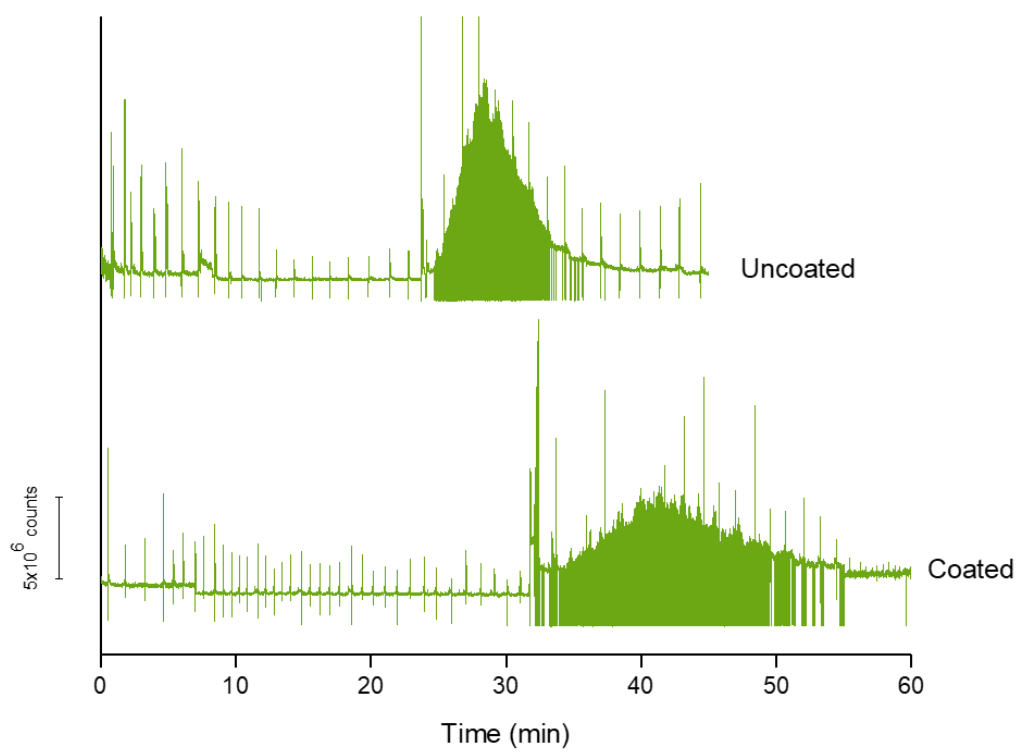

**Figure S4.** Comparison of peak capacities obtained with triplicate injections of E. Coli digest using BFS and PVA-coated capillaries. Statistic comparisons were performed using GraphPad Prism (La Jolla, CA, USA). (Mann-Whitney test; \*,  $P \leq 0.05$ )

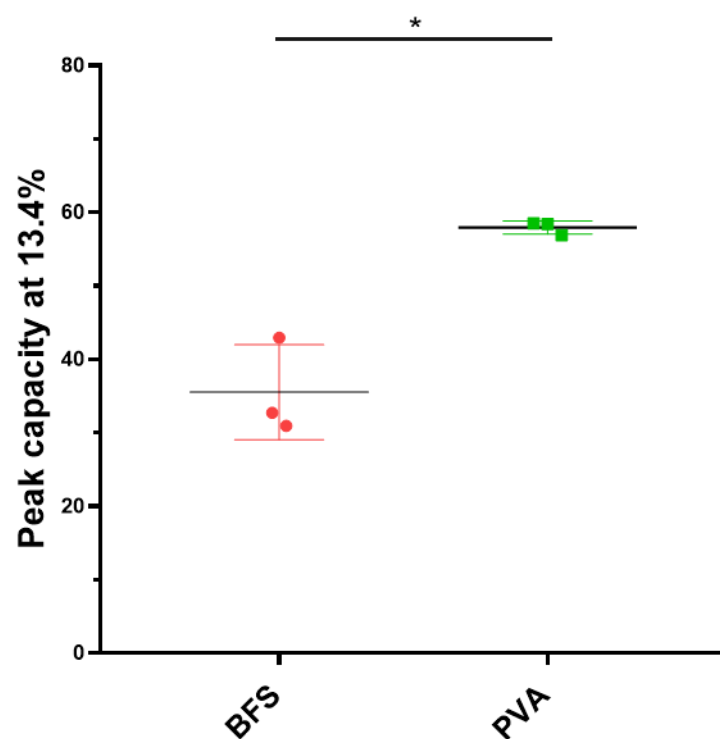

**Figure S5.** Influence of injected sample volume on the number of identified proteins using four different concentrations of *E. coli* digest. Statistic comparisons were performed using GraphPad Prism (La Jolla, CA, USA). (Mann-Whitney test; \*,  $P \leq 0.05$  and \*\*,  $P \leq 0.01$ )

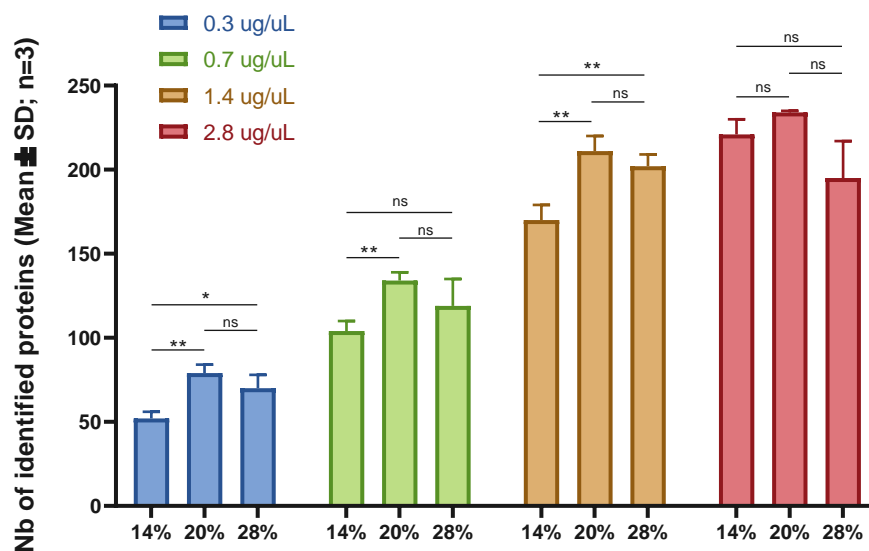

**Figure S6.** Uniqueness of identified proteins by analyzing LP-1 cell lines using RPLC-Chip and CZE coupled with DTIMS-QTOF.

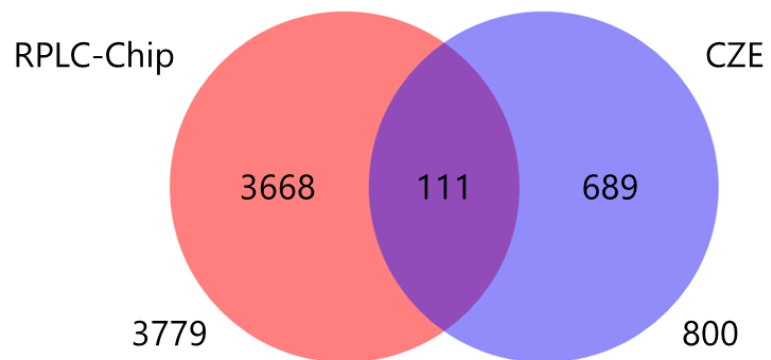

**Figure S7.** Univariate comparison of various physicochemical properties of peptides identified in CZE and RPLC-Chip: (a) Peptide length, (b) Peptide mass, (c) Precursor m/z ratio, (d) pI, (e) Mass/length ratio, (f) GRAVY score. Statistic comparisons were performed using GraphPad Prism (La Jolla, CA, USA). (Mann-Whitney test; \*\*\*,  $P \leq 0.001$  and \*\*\*\*,  $P \leq 0.0001$ )

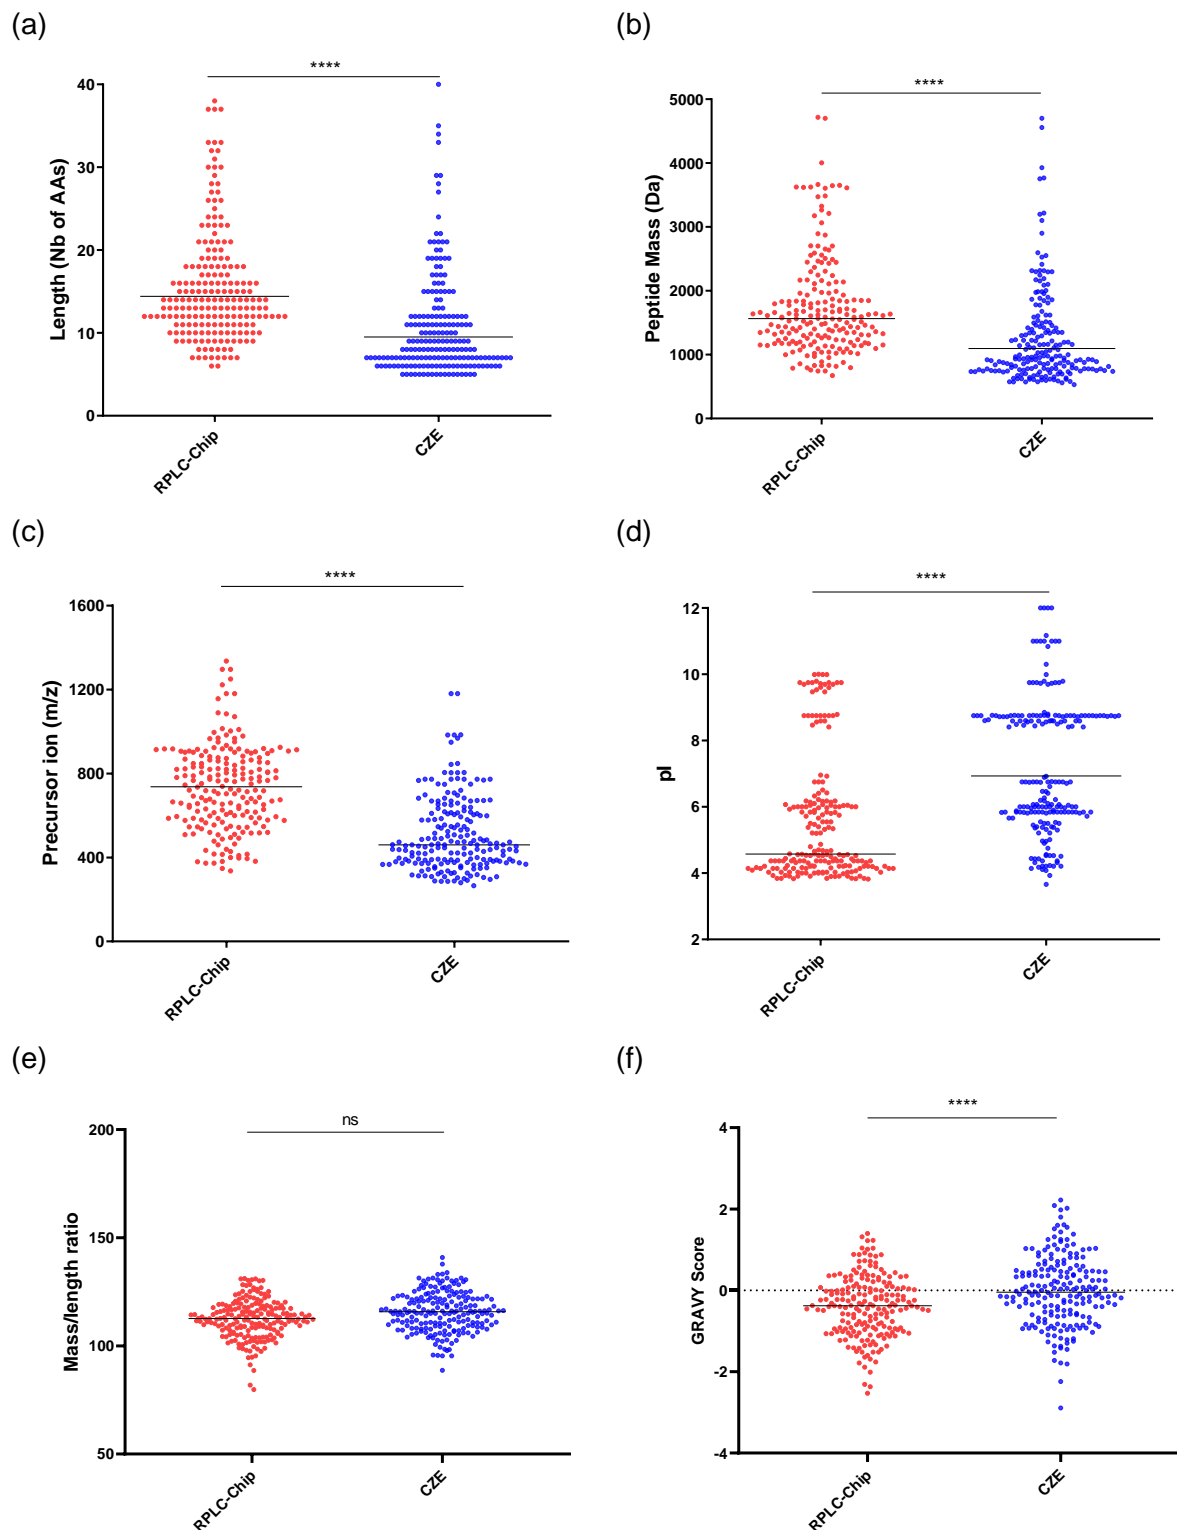

Supplement: s1 [file s1]
